## Editorial Board

### EDITOR-IN-CHIEF

**Erin L. Dolan**  
University of Georgia  
eldolan@uga.edu

### SENIOR EDITORS

**Daron Barnard**  
Worcester State College  
daron.barnard@worcester.edu

**Graham F. Hatfull**  
University of Pittsburgh  
gfh@pitt.edu

**Jose Herrera**  
Mercy College  
jherrera@mercy.edu

### EDITORS

**Joel K. Abraham**  
California State University, Fullerton  
jkabraham@fullerton.edu

**Bruce Alberts**  
University of California, San Francisco  
balberts@ucsf.edu

**Janet Batzli**  
University of Wisconsin-Madison  
jcbatzli@wisc.edu

**Cynthia Bauerle**  
James Madison University  
bauerlcm@jmu.edu

**Cynthia Brame**  
Vanderbilt University  
cynthia.brame@vanderbilt.edu

**Peggy Brickman**  
University of Georgia  
brickman@uga.edu

**Katayoun Chamany**  
Eugene Lang College  
The New School for Liberal Arts  
chamanyak@newschool.edu

**Clark Coffman**  
Iowa State University  
ccoffman@iastate.edu

**John Coley**  
Northeastern University  
j.coley@neu.edu

**James Collins**  
Arizona State University  
jcollins@asu.edu

**Sarah L. Eddy**  
Florida International University  
seddy@fiu.edu

**Kenneth Gibbs**  
National Institute of  
General Medical Sciences  
kgibbsjr@gmail.com

**Julia Gouvea**  
Tufts  
Julia.Gouvea@tufts.edu

**James Hewlett**  
Finger Lakes Community College  
hewletja@floc.edu

**Jennifer Knight**  
University of Colorado, Boulder  
jennifer.knight@colorado.edu

**Jay Labov**  
National Research Council  
jlabov@nas.edu

**Mary Lee Ledbetter**  
College of the Holy Cross  
mledbett@holycross.edu

**Jennifer Loertscher**  
Seattle University  
loertscher@seattleu.edu

**Kelly Mack**  
Association of American Colleges  
and Universities  
mack@aacu.org

**David Marcey**  
California Lutheran University  
marcey@callutheran.edu

**Kenneth Miller**  
Brown University  
kenneth\_miller@brown.edu

**Jennifer Momsen**  
North Dakota State University  
Jennifer.Momsen@ndsu.edu

**Ross Nehm**  
Stony Brook University  
ross.nehm@stonybrook.edu

**Diane K. O'Dowd**  
University of California, Irvine  
dkodowd@uci.edu

**Nancy Pelaez**  
Purdue University  
npelaez@purdue.edu

**Kathryn E. Perez**  
University of Texas Rio Grande Valley  
kathryn.perez@utrgv.edu

**Rebecca Price**  
University of Washington Bothell  
beccap@uw.edu

**C. Gary Reiness**  
Lewis and Clark College  
reiness@lclark.edu

**Jeff Schinske**  
De Anza College  
schinskejeff@fhda.edu

**Elizabeth Schussler**  
University of Tennessee Knoxville  
eschuss@utk.edu

**Hannah Sevian**  
University of Massachusetts Boston  
Hannah.Sevian@umb.edu

**Michèle Shuster**  
New Mexico State University  
mshuster@nmsu.edu

**James J. Smith**  
Michigan State University  
jimsmith@msu.edu

**Michelle Smith**  
University of Maine  
michelle.k.smith@maine.edu

**Rebecca Smith**  
University of California, San Francisco  
rebecca.smith@ucsf.edu

**Rachelle Spell**  
Emory University  
rspell@emory.edu

**Marilyne Stains**  
University of Nebraska, Lincoln  
mstains2@unl.edu

**Marshall Sundberg**  
Emporia State University  
sundberm@esumail.emporia.edu

**Kimberly Tanner**  
San Francisco State University  
kdtanner@sfsu.edu

**Debra Tomanek**  
University of Arizona  
dtomanek@u.arizona.edu

**Kristy Jean Wilson**  
Marian University  
kjwilson@marian.edu

**Adele Wolfson**  
Wellesley College  
awolfson@wellesley.edu

### PUBLISHER

**Erika C. Shugart**  
ASCB Chief Executive Officer

**W. Mark Leader**  
ASCB Publications Director

**Thea Clarke**  
ASCB Director of Communications  
and Education

**Eric T. Baker**  
Managing Editor

Published by

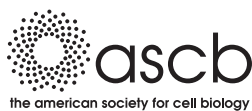

Editorial Partner

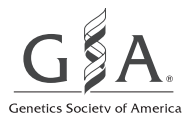

CBE—Life Sciences Education (ISSN 1931-7913) is published online quarterly (one volume per year) by The American Society for Cell Biology, 8120 Woodmont Avenue, Suite 750, Bethesda, MD 20814-2762, USA; www.ascb.org. The journal, which is accessible at www.lifescied.org and www.pubmedcentral.nih.gov, is supported in part by a grant from the Howard Hughes Medical Institute. "ASCB," "The American Society for Cell Biology," "iBioSeminars," and "Molecular Biology of the Cell" are registered trademarks of The American Society for Cell Biology. "The Cell: An Image Library" is a common law trademark of The American Society for Cell Biology.

Owned and published by The American Society for Cell Biology, Erika C. Shugart, Executive Director
